# Supplementary material
Source: MDPI journal article supplement (https://www.mdpi.com/2075-163X/13/7/921)
Supplement: s1 [file s1]

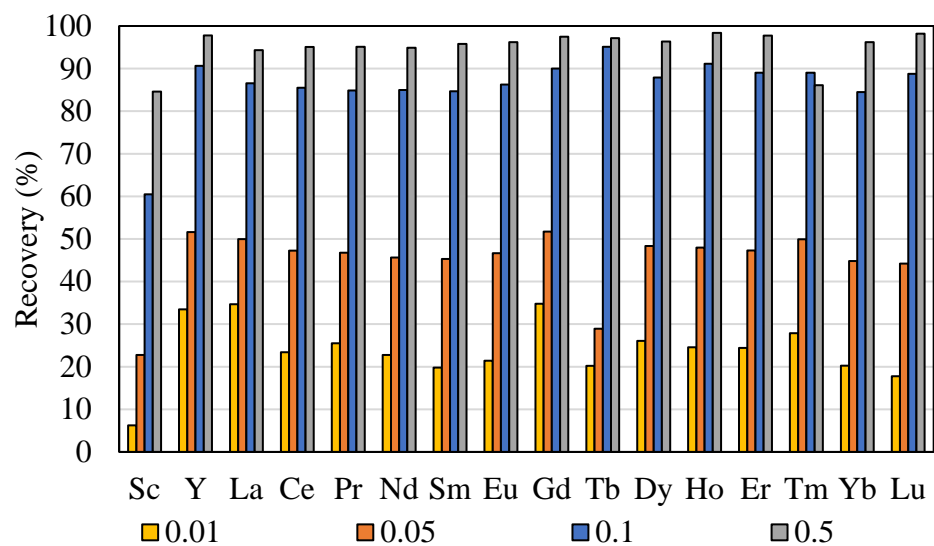

Figure S1. Leaching characteristics of individual rare earth elements as a function of varying sulfuric acid concentrations (mol/L).

Table S1. Individual REE content in the lignite material screened at 30 mesh.

| Sc    | Y     | La    | Ce     | Pr    | Nd    | Sm    | Eu    | Gd    |
|-------|-------|-------|--------|-------|-------|-------|-------|-------|
| 13.36 | 84.37 | 72.22 | 146.17 | 15.54 | 58.75 | 12.74 | 2.79  | 16.16 |
| Tb    | Dy    | Ho    | Er     | Tm    | Yb    | Lu    | LREE  | HREE  |
| 1.29  | 15.37 | 2.27  | 5.87   | 1.14  | 7.13  | 1.37  | 337.7 | 118.8 |
